# Supplementary material for: Borate Transporters and SLC4 Bicarbonate Transporters Share Key Functional Properties
Source: MDPI journal article supplement (doi:10.3390/membranes13020235), 2023-02-15
Supplement: s1 [file s1]

**A**

|          |                                                                                         | Helix H1   |            |
|----------|-----------------------------------------------------------------------------------------|------------|------------|
| HsSLC4A1 | -----GLVRD                                                                              | IRRRYPYYLS | 395        |
| AtBOR1   | -----MEETFV--PFEGIKNDLKGRLMCYKQ                                                         |            | 24         |
| SmBorlp  | MLKDSTGVTISRGFASRECTQPSEETNDEPNTESSVVDSRNDDEESHEKLSRRRLPKLGMGIWLDLDKDRIPYYKS            |            | 75         |
| ScBorlp  | MSNESTRVTVSRGCTASDECAQALERTNDELDRRESSVSESRSDEESHEKLSRRRFPTLGIGIWLDLDKDRIPYYKS           |            | 75         |
|          | TM1                                                                                     | TM2        |            |
| HsSLC4A1 | DITDAFSP--QVLAAVIFIYFAALSPAIFGGLLGEKTRNQMGVSELLISTAVQGILFALLGAQPLLVVGFSGPL              |            | 468        |
| AtBOR1   | DWTGGFKAGFRILAPTTYIFFASAIPVISFGEQLERSTDGVLTAVQTLASTAICGMIHSII GGQPLLI LGVAEPT           |            | 99         |
| SmBorlp  | DWVDAFNY--RVIPSTVDTYFN NLLPAIAFAQDMFDRTDNSYG VNEVL LSSAMAGIVFGVL AGQPLCIVGVTGPI         |            | 148        |
| ScBorlp  | DWVDAFNY--RVIPSIVDTYFN NLLPAIAFAQDMFDRTDNSYG VNEVL LSSAMAGIVFGVL GGQPLCIVGVTGPI         |            | 14         |
|          | N96                                                                                     | G135       |            |
|          | TM3                                                                                     | TM4        | TM5        |
| HsSLC4A1 | LVFEEAFFSFCETNG----LEYIVGRVWIGFWLILLVLVVAFEGSFLVRFI SRYTQEIFS FLISLI FIYETFSK           |            | 539        |
| AtBOR1   | VIMYTFMFNFAKARPELGRDLFLAWSGWVCVWTALMLFVLAICGACSIINRFTRVAGELFGLLIAMLFMQQAIKG             |            | 174        |
| SmBorlp  | SIFNYTVYEIIKPLN----TSYFGFMFWICLWSMIFHLLLAFTNVVCLLQYVTTFFPCDIFGLFINVVYIQKGIQI            |            | 219        |
| ScBorlp  | SIFNYTVYEIIKPLN----TSYFGFMFWICMWSMIFHLVLAFNAVCLLQYVTTFFPCDIFGLFINVVYIQKGIQI             |            | 219        |
|          |                                                                                         | Y212       |            |
|          | TM6                                                                                     |            |            |
| HsSLC4A1 | LIIKFQDHPLQKTYNNVLMVPKPGQPLPNTALLSLVLMAGTFFFAMMLRKFKNSSYFPGKLRRVIGDFGVPISI              |            | 614        |
| AtBOR1   | LVDEFRIPERENQK-LKEF---LPSWRF-ANGMFALVLSFGLLLTG LRSRKARSWRYGTGWLRS LIADYGVP LMV          |            | 244        |
| SmBorlp  | LTRQFHNTSGEKSV-----QDG FASVVVALVM TAFGLFFKSFHHY PLFTHKIRT FISDY STALS V                 |            | 279        |
| ScBorlp  | LTRQFSAKSGEKSV-----QDG FASVVVALVM TAFGLFFKLFHY YPLFSHRIRTFISDY STALS V                  |            | 279        |
|          | TM7                                                                                     | TM8        |            |
| HsSLC4A1 | LIMVLVDEFFIQ---DITYTQKLSVPDGFKVSNS SARGWVIHPLGL-----RSEFP IWM MFASAL PALLVF ILIFL       |            | 680        |
| AtBOR1   | LVWTVGSYI-----PAGDV PKGI PRRLF SPNP WSPGAYGNW TVVKEM LDVIPY I IGAF IPASMI AVLYYF        |            | 315        |
| SmBorlp  | LFWSSFTHFGGYLNDVKFKKLPITK-----SFFPTS KFNRP QNTWLAYE---PIPV KDVFIAL PF GII LTILFYF       |            | 346        |
| ScBorlp  | LFWSSFTHFGGYLHDVKFKKLPITK-----AFFPTS KVNRP QNTWLAYE---PIPV KDVFIAL PF GI FLTILFYF       |            | 346        |
|          | TM9                                                                                     | TM10       |            |
| HsSLC4A1 | ESQITT LIVSKPERKMVGSGFHL D LLLV VMGGVAALFGMPWL SATTV RSVTHAN-----                       |            | 736        |
| AtBOR1   | DHSV ASQLAQ QKEFNLRKPSSYHY D LLLGFLTMCGL LGVPPS NGVIP QSPMHTKSLATLKYQLLRNL VATAR        |            | 385        |
| SmBorlp  | DHN VSSLMAQRHQYKLRKPSSFH Y DFALL GLTTCISGV LGIPAP NGLIP QAPLHTETLLVRDS-----             |            | 409        |
| ScBorlp  | DHN VSSLMAQRHQYK LKKPSSFH Y DFALL GLTTCISGV LGIPAP NGLIP QAPLHTETLLVRDS-----            |            | 409        |
|          | D347                                                                                    | D371       | N391 Q396A |
| HsSLC4A1 | -----ALTVM GKASTPG-----AAAQ IQEV                                                        |            | 756        |
| AtBOR1   | RSIKTNASLGQLYDNMQEAYHHMQTPLVYQQPQGLKELKESTIQATTFTG NLNAPVDET LF DIEKE IDDLLPVEV         |            | 460        |
| SmBorlp  | -----NQ NVRC                                                                            |            | 416        |
| ScBorlp  | -----NQKVISC                                                                            |            | 416        |
|          | TM11                                                                                    | TM12       |            |
| HsSLC4A1 | KEQR ISGLLVAVLVGLSIL--MEPILSRIP LAVLFGIFLYM GVTSLSGIQLFDRILL LFKPPKYHPDVP-----          |            | 823        |
| AtBOR1   | KEQ RVSN LLQSTMVGGCVA--AMPILK MIPTSV LWGYFAFMAIESLP GNQFW ERILL FTAPS RR FKVLEDYHAT     |            | 533        |
| SmBorlp  | VEQ RL TNT FQGLMILGTMT RPLL VCLGEIP QAVLSGLFF IMINGL M TNV I IHRIV L FSDPKRR DN NSPL--- |            | 487        |
| ScBorlp  | VEQ RF TNT FQGLMILGTMT RPLL VCLGEIP QAVLSGLFF IMINGL M TNS IIQRLV L FSDPNRR DN TSPL---  |            | 487        |
|          | R420 T422                                                                               | G458       |            |
|          | TM13                                                                                    | TM14       |            |
| HsSLC4A1 | YVKRVKTWRMHL---FTGIQII CLAVL WVVKSTPASLALPFVLILT VPLRRVLLPLIFRNVELQC LDADD AKAT         |            | 894        |
| AtBOR1   | FVETVPFKTIAMFTLFQT TYLLICFGLTWIPI---AGVMFPLMIMFLIPVRQYLLPRFFKGAHLQDLDA AEYEEA           |            | 605        |
| SmBorlp  | --AKISK RSMVIF---LCFSLAGFTGEFAITNTIAAIGFPLVLLLSVIVS-FSFTYIFP SEELKVLD NNVAQR F          |            | 555        |
| ScBorlp  | --MKVSKKS MLIF---LSFSLTG FAGEFAITNTIAAIGFPLVLLLSVLVS-FSFAYIFP TEELKILD TNVAQKF          |            | 555        |
| HsSLC4A1 | FDE-----EEG-----RDEYDEVAMPV-                                                            | 911        |            |
| AtBOR1   | PALPFN LA AETEIGSTTSYPGDLEILDEVMTRS RGEFR HTSSPKV                                       | 650        |            |
| SmBorlp  | TLKNLLLL ENI-----RDAKFSDRHKF-----                                                       | 576        |            |
| ScBorlp  | TIKNLLLL ENI-----RDAKFCDKHED-----                                                       | 576        |            |

**B**

|          | ScBor1p | SmBor1p | AtBOR1  | HsSLC4A1 |
|----------|---------|---------|---------|----------|
| ScBor1p  | 100.00% | 88.89%  | 27.79%  | 24.69%   |
| SmBor1p  | 88.89%  | 100.00% | 27.98%  | 24.69%   |
| AtBOR1   | 27.79%  | 27.98%  | 100.00% | 28.24%   |
| HsSLC4A1 | 24.69%  | 24.69%  | 28.24%  | 100.00%  |

**Figure S1.** Alignment of borate transporters with human SLC4A1. **(A)** Alignment was performed in UniProt using the full-length sequences for ScBor1p, SmBor1p, AtBOR1, and the membrane domain sequence for human SLC4A1. Marked in red are residues investigated in this study, with *S. cerevisiae* numbering below. Helix H1 and all 14 transmembrane helices are indicated above their respective sequences. In blue are regions which when deleted result in lost function. **(B)** UniProt output for the percent identity matrix for the four sequences.

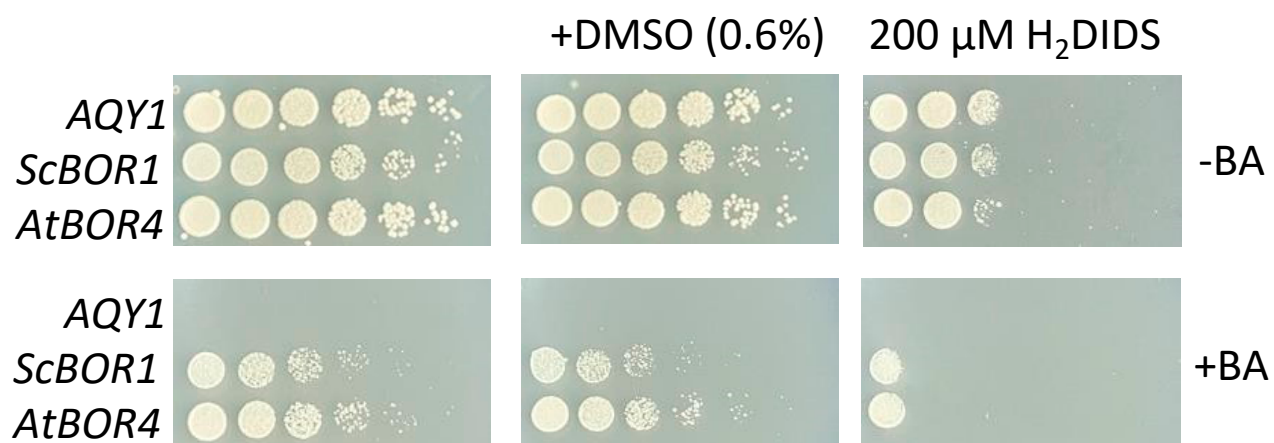

**Figure S2.** Sensitivity to H<sub>2</sub>DIDS. Plasmids encoding the specified gene were tested against H<sub>2</sub>DIDS in 0.6% DMSO or just 0.6% DMSO in the presence or absence of 20mM boric acid and plated on CSM-His selective media. Plates were incubated at 30°C and imaged after 5 days.
